# Supplementary material for: Rational design of a BIAN-based multi-functional additive for higher durability and performance of LiMn1/3Ni1/3Co1/3O2 cathodes
Source: Royal Society of Chemistry journal article supplement (doi:10.1039/c9me00046a), 2019-01-01
Supplement: c9me00046a1.pdf [file c9me00046a1.pdf]

## **Supporting information**

# **Rational Design of BIAN Based Multi-functional Additive for Higher Durability and Performance of $\text{LiMn}_{1/3}\text{Ni}_{1/3}\text{Co}_{1/3}\text{O}_2$ Cathodes**

*Sai Gourang Patnaik<sup>□</sup>, Raman Vedarajan<sup>†</sup> and Noriyoshi Matsumi\**

\*School of Materials Science, Japan Advanced Institute of Science and Technology (JAIST),

1-1 Asahidai, Nomi, Ishikawa, 923-1292, Japan. E-mail: [matsumi@jaist.ac.jp](mailto:matsumi@jaist.ac.jp)

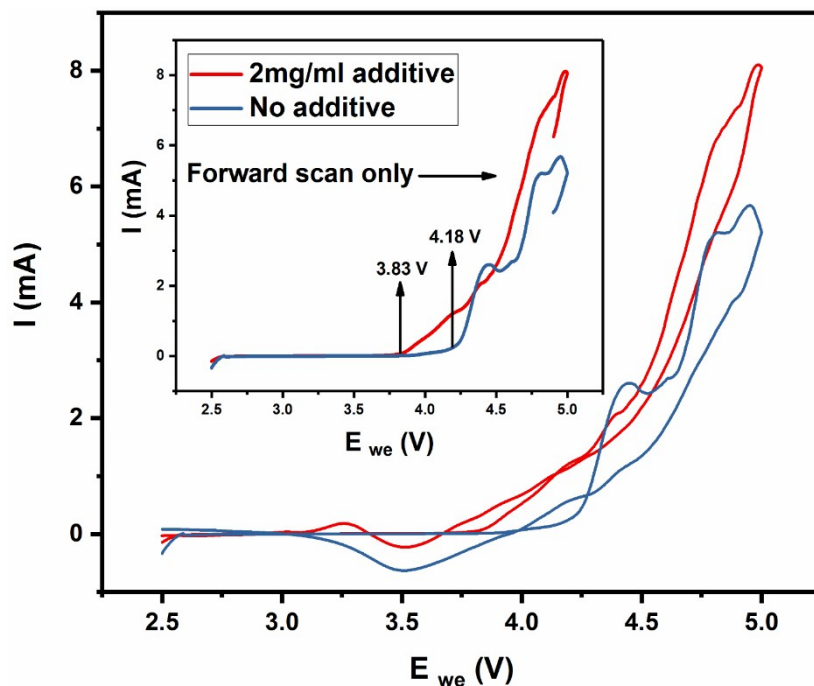

Figure S1. Comparison of first CV cycle with and without BIANODA as additive in cathodic half-cell set up (MNC cathode in 1M LiPF<sub>6</sub> in EC:DEC W.r.t Li)

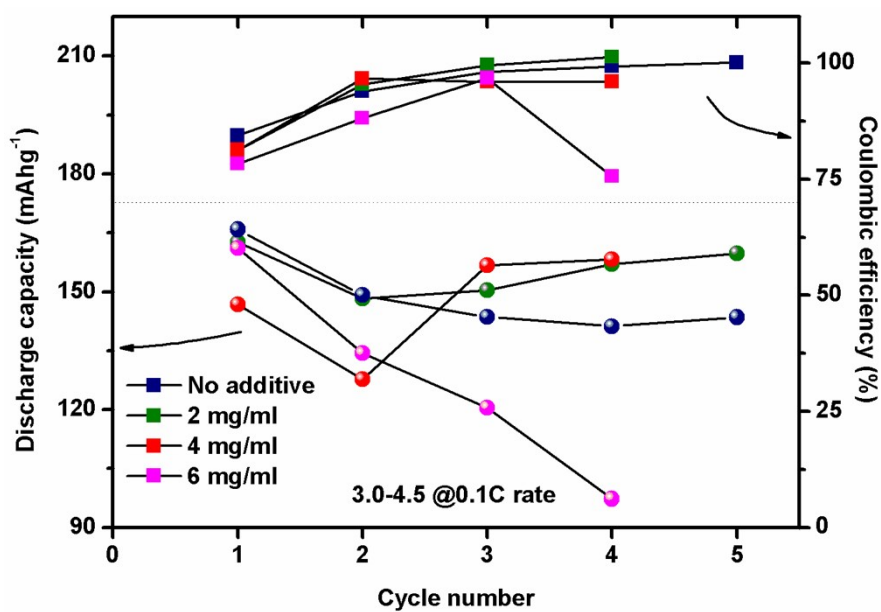

Figure S2. Evolution of discharge capacity upon varying concentration of BIANODA (at 0.1C rate)

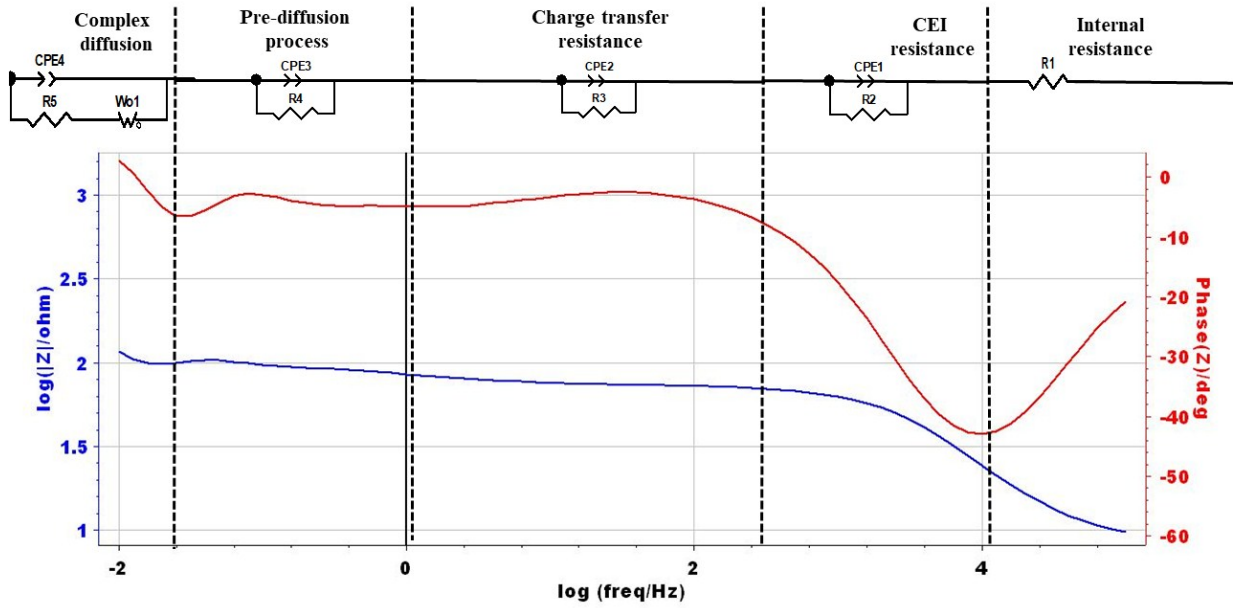

Figure S3. Bode impedance plot of cell without additive (from Dynamic EIS during discharge at potential 3.6V)

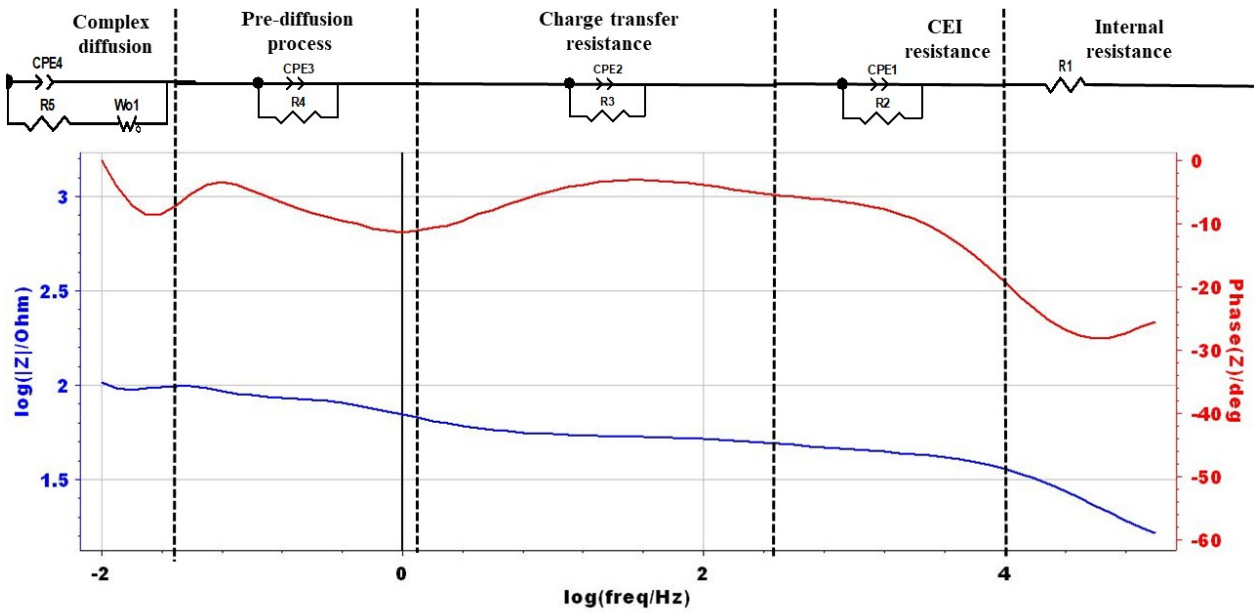

Figure S4. Bode impedance plot of cell with 2mg/ml BIANODA (from Dynamic EIS during discharge at potential 3.6V)

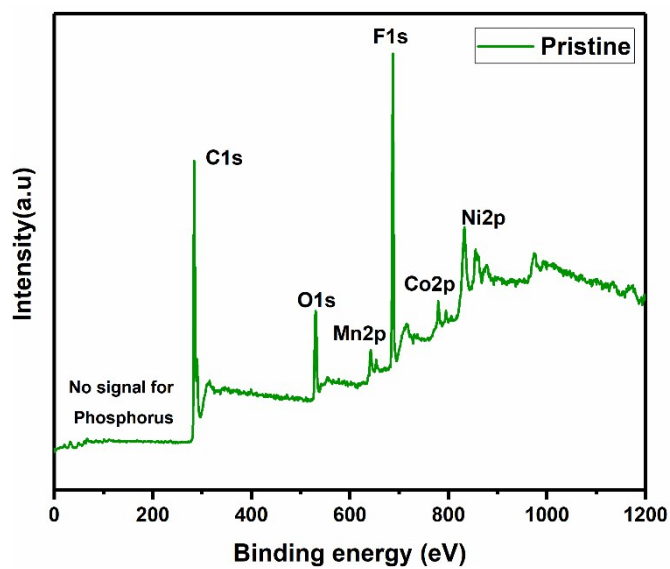

Figure S5. A. XPS of pristine electrode surface

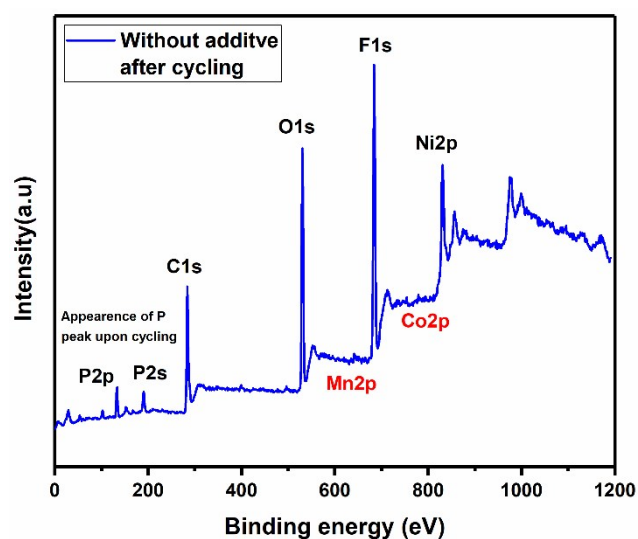

Figure S5. B. XPS of electrode surface after cycling without additive

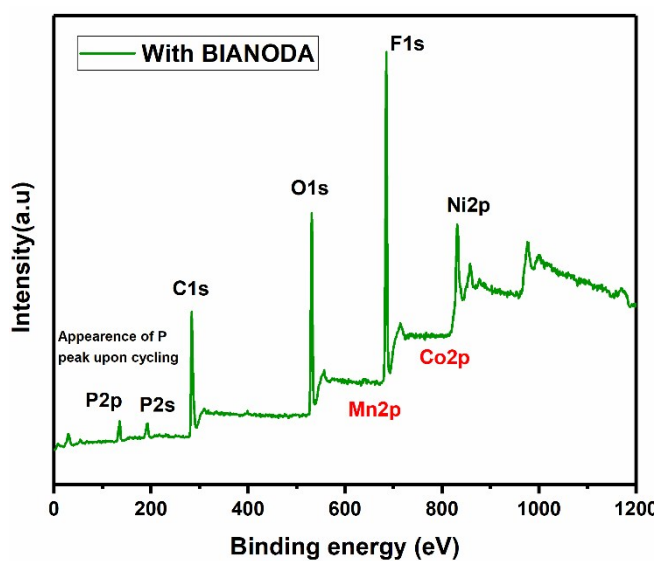

Figure S5. C. XPS of electrode surface after cycling with BIANODA

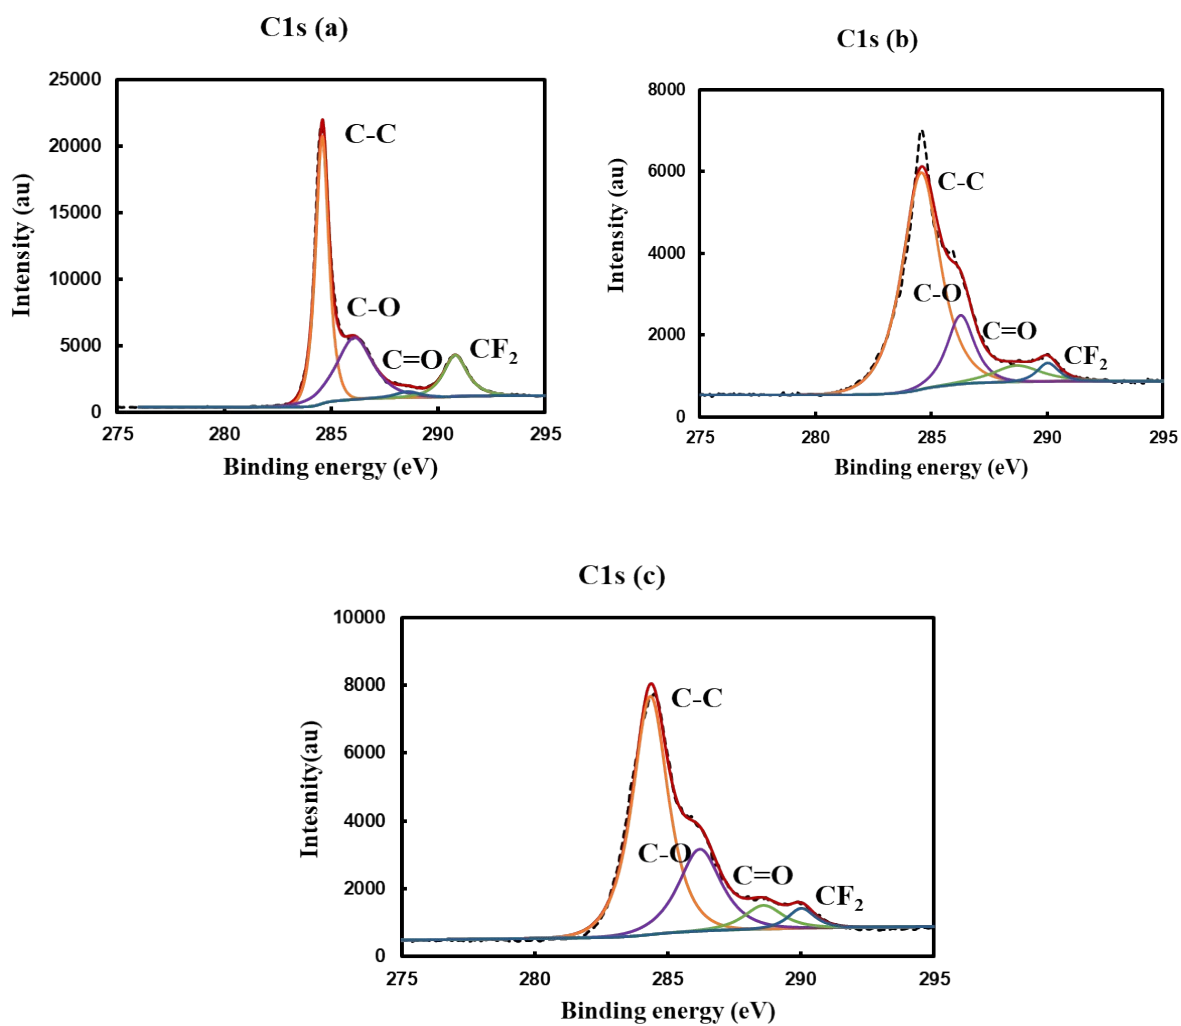

**Figure S6. XPS spectra for C 1s of (a) pristine cathode, (b) cathode surface after cycling without additive and (c) cathode surface after cycling with additive**

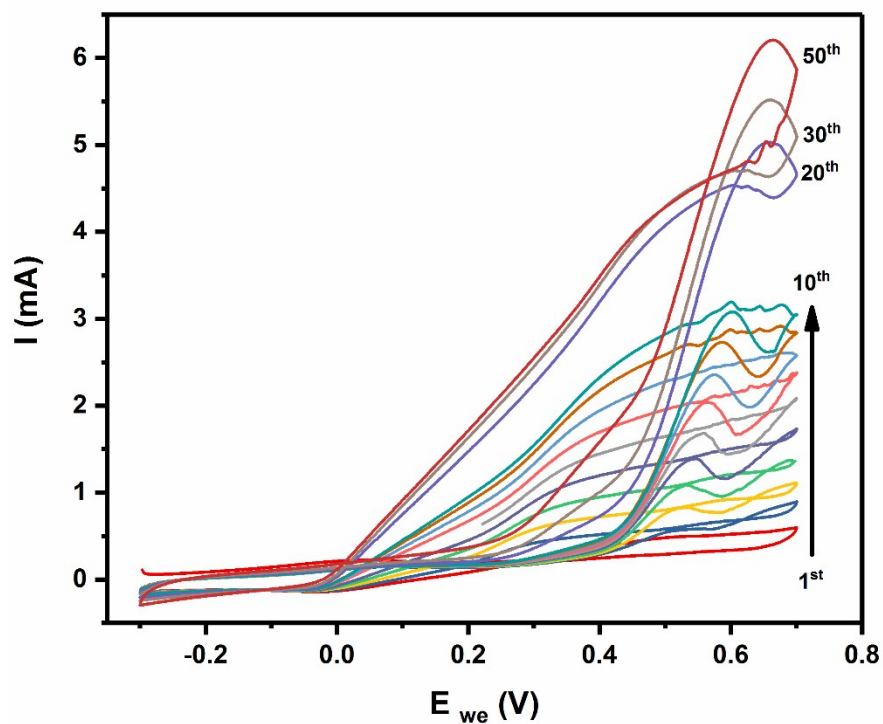

Figure S7. Cyclic voltammograms during electropolymerisation of BIANODA in 0.1M  $\text{LiClO}_4$  acetonitrile solution (WE: Pt disc, RE: Ag/AgCN, CE: Pt wire)

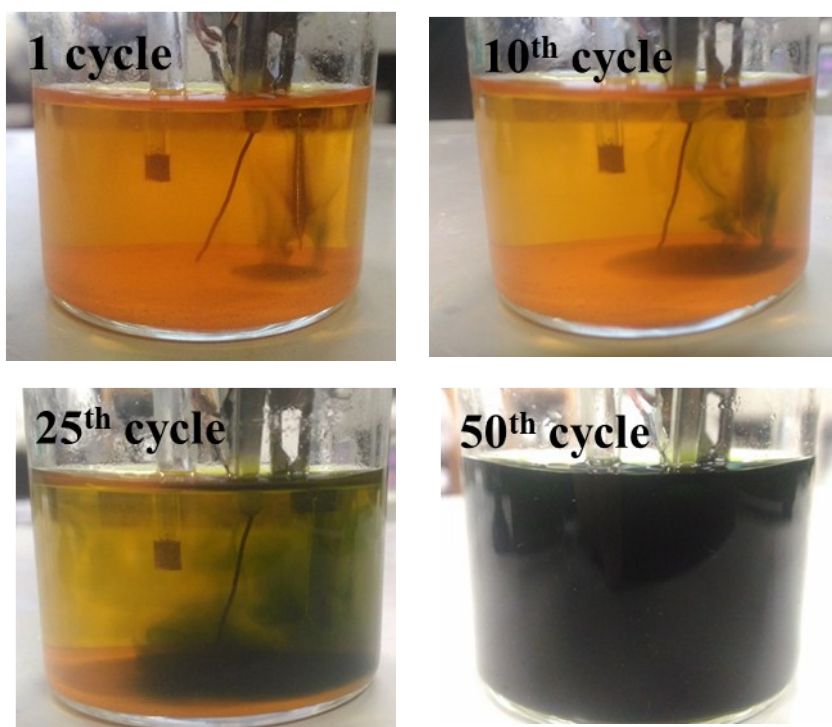

Figure S8. Digital images during different number of CV cycles of electropolymerisation

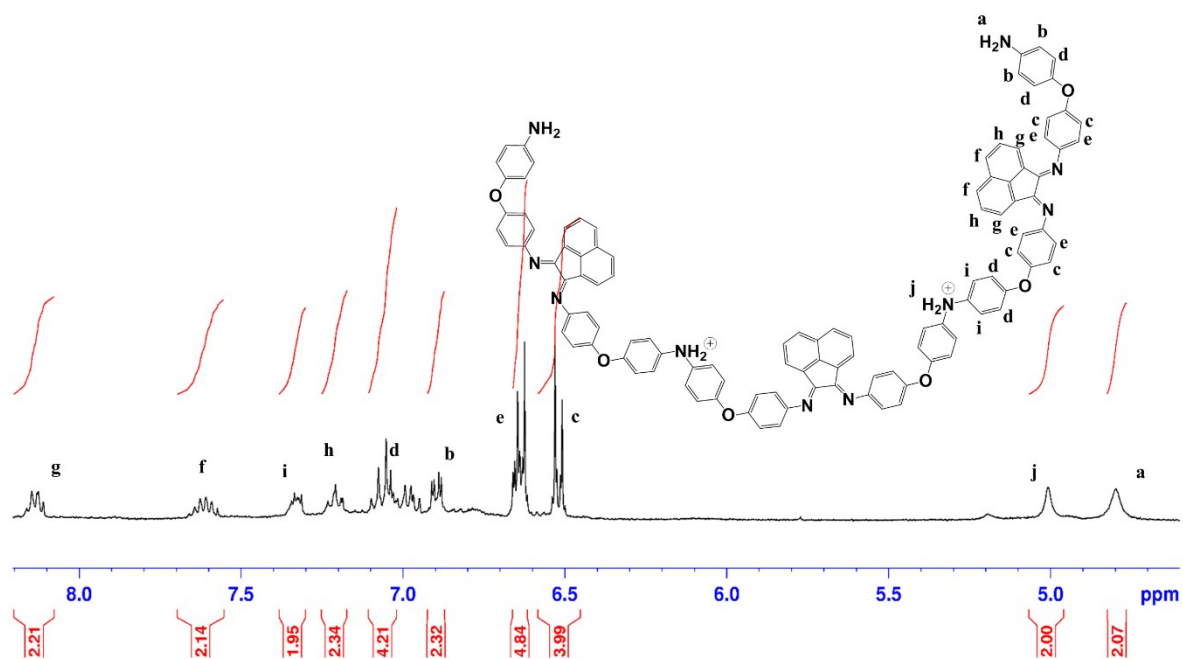

Figure S9. <sup>1</sup>H NMR of the electropolymerised product in DMSO-d<sub>6</sub>

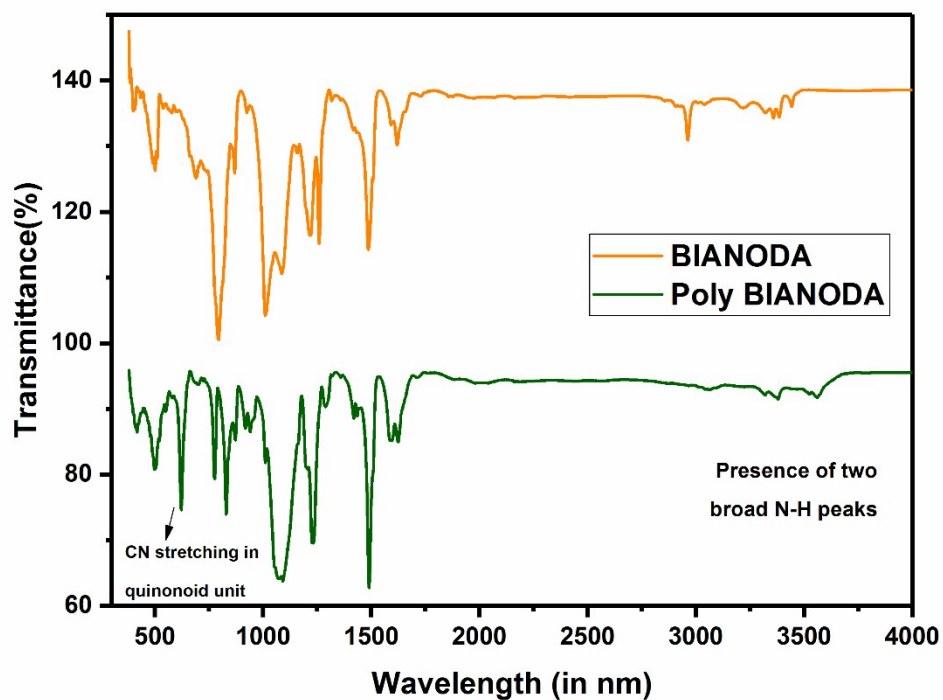

Figure S10. Comparison of IR spectra of BIANODA and the electropolymerised product

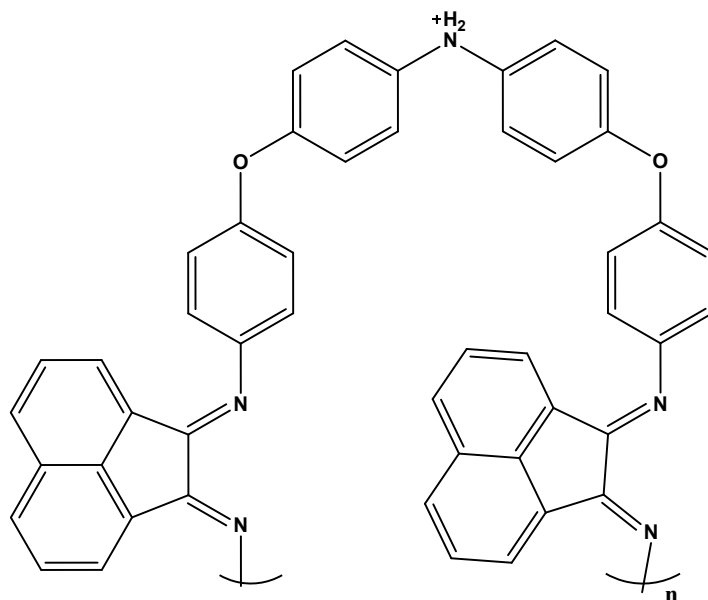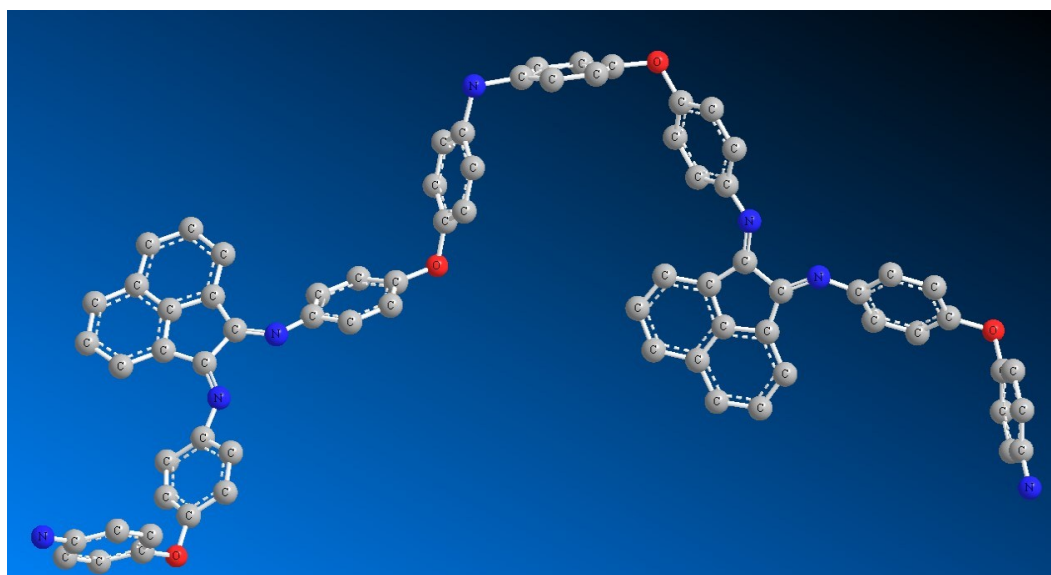

**Figure S11. Probable structure of the electropolymerised product and its optimised structure**



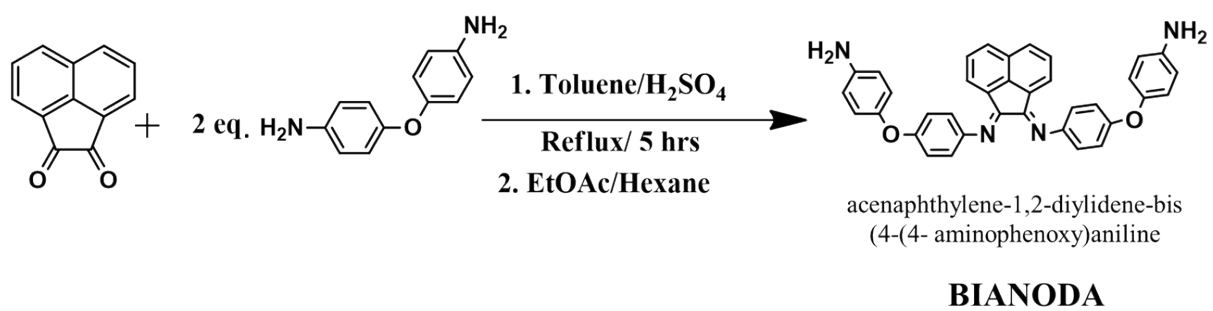

Figure S12. Synthetic route to BIANODA

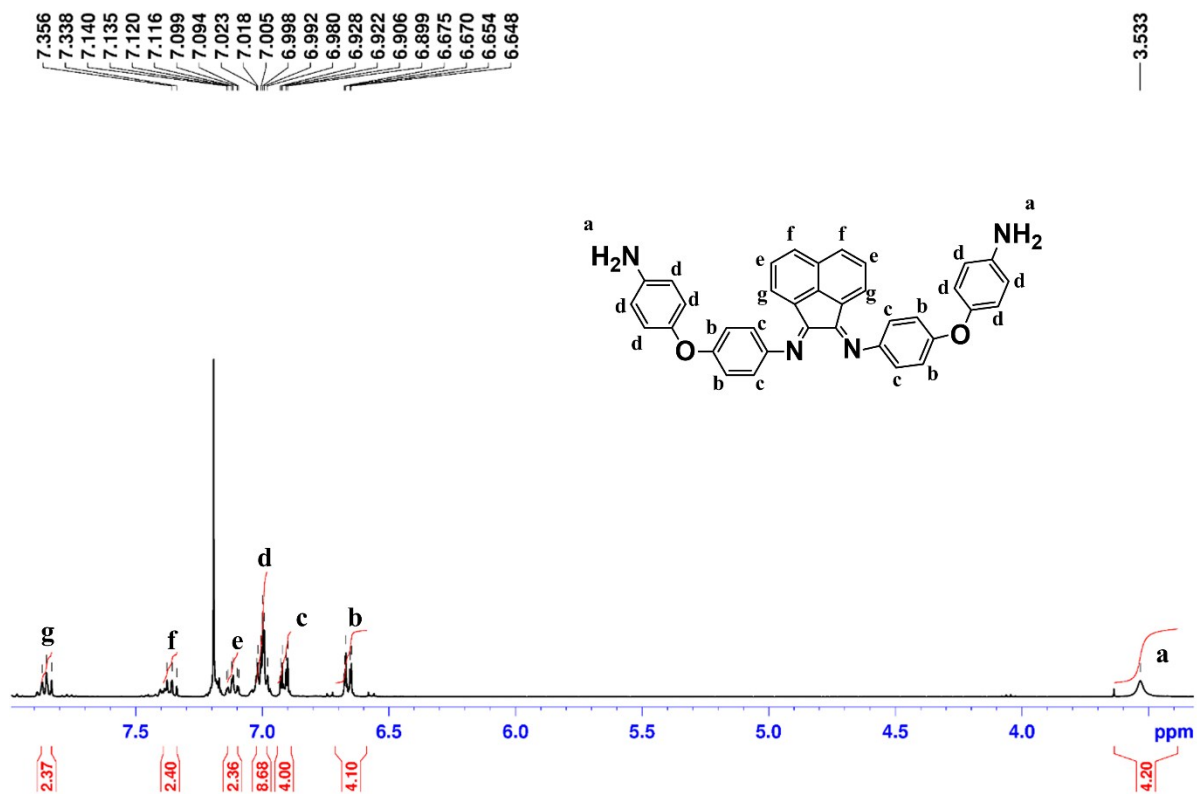

Figure S13.  $^1\text{H}$  NMR of BIANODA in  $\text{CDCl}_3$

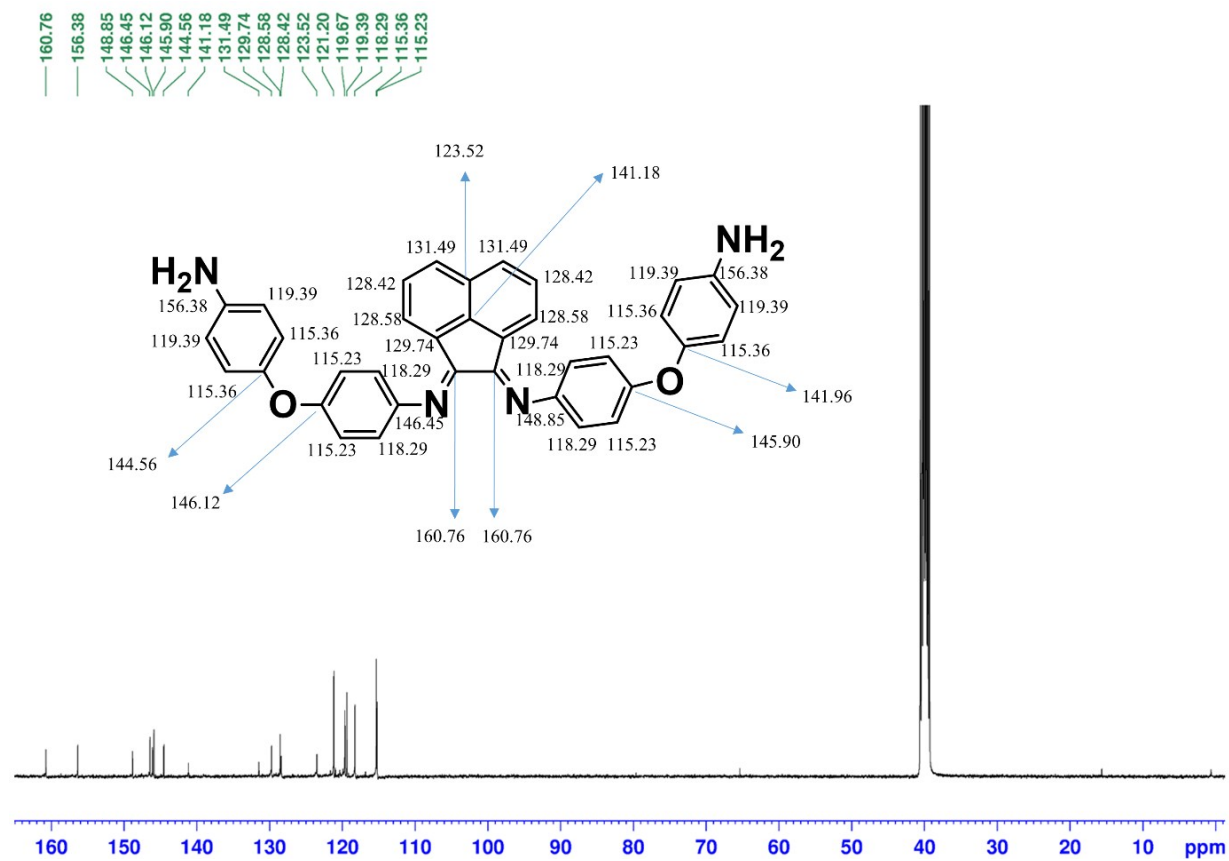

Figure S14.  $^{13}\text{C}$  NMR of BIANODA in  $\text{CDCl}_3$

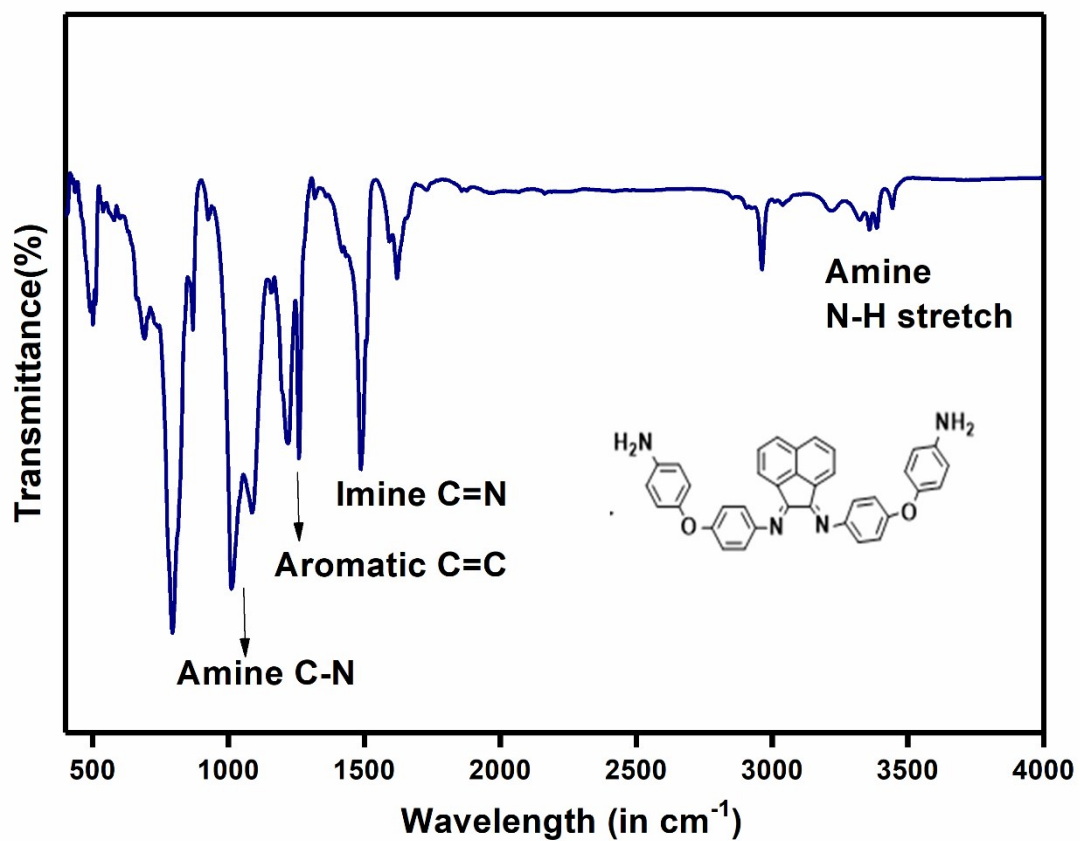

Figure S15. IR spectrum of BIANODA

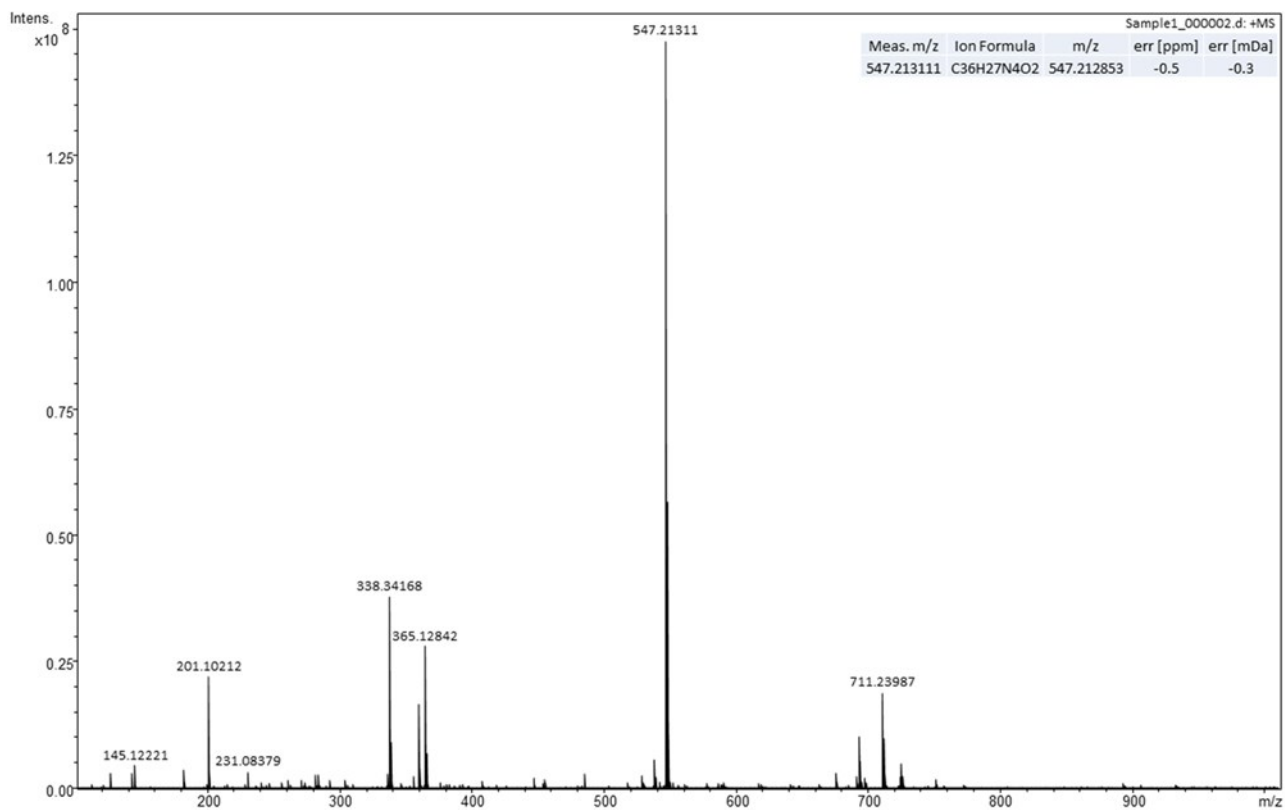

Figure S16. Mass spectrum of BIANODA
